1 **Discovery and characterization of H<sub>v</sub>1-type proton channels in reef-building corals.**

2

3 Gisela E. Rangel-Yescas<sup>1</sup>, Cecilia Cervantes<sup>1</sup>, Miguel A. Cervantes-Rocha<sup>1</sup>, Esteban Suarez-  
4 Delgado<sup>1</sup>, Anastazia T. Banaszak<sup>2</sup>, Ernesto Maldonado<sup>2</sup>, Ian. S. Ramsey<sup>3</sup>, Tamara Rosenbaum<sup>4</sup>  
5 and León D. Islas<sup>1\*</sup>

6

7 From:

8 <sup>1</sup>Departamento de Fisiología, Facultad of Medicina, Universidad Nacional Autónoma de  
9 México, Mexico City, Mexico

10 <sup>2</sup>Unidad Académica de Sistemas Arrecifales, Instituto de Ciencias del Mar y Limnología,  
11 Universidad Nacional Autónoma de México, Puerto Morelos, Quintana Roo, Mexico

12 <sup>3</sup>Department of Physiology and Biophysics, School of Medicine, Virginia Commonwealth  
13 University, Richmond, VA, USA

14 <sup>4</sup>Departamento of Neurociencia Cognitiva, Instituto de Fisiología Celular, Universidad  
15 Nacional Autónoma de México, Mexico City, Mexico

16

17

18

19

20

21

22

23

24 \*Correspondence to:

25 León D. Islas, PhD

26 Departamento de Fisiología

27 Facultad de Medicina, UNAM,

28 Ciudad Universitaria, Circuito Escolar S/N

29 Ciudad de México, 04510, México

30 [leon.islas@gmail.com](mailto:leon.islas@gmail.com)

31

## 32 **Abstract**

33 Voltage-dependent proton-permeable channels are membrane proteins mediating a number  
34 of important physiological functions. Here we report the presence of a gene encoding for Hv1  
35 voltage-dependent, proton-permeable channels in two species of reef-building corals. We  
36 performed a characterization of their biophysical properties and found that these channels  
37 are fast-activating and modulated by the pH gradient in a manner that makes them  
38 interesting models for studying these processes more easily. We have also developed an  
39 allosteric gating model that provides mechanistic insight into the modulation of voltage-  
40 dependence by protons. This work also represents the first functional characterization of  
41 any ion channel in scleractinian corals. We discuss the implications of the presence of these  
42 channels in the membranes of coral cells in the calcification and pH regulation processes and  
43 possible consequences of ocean acidification related to the function of these channels.

## 44 45 **Introduction**

46 Voltage-gated, proton-permeable channels are formed by a voltage-sensing domain encoded  
47 by the Hv1 protein (Sasaki et al., 2006; Ramsey et al., 2006). These channels are different  
48 from canonical voltage-gated channels in that both voltage-sensing and permeation are  
49 mediated through a single protein domain. Several functional properties of these channels  
50 are also distinct. Most proton permeable channels seem to have evolved to extrude protons  
51 from the cell, and towards this end, their voltage dependence is tightly modulated by the  
52 proton gradient between extracellular and intracellular solutions (Cherny et al., 1995).  
53 These channels seem fundamental in handling fluctuations in intracellular pH and take part  
54 in several well-characterized physiological processes that depend on proton concentration  
55 changes, such as intracellular pH regulation, sperm flagellum beating, ROS production and  
56 bacterial killing in immune cells, initiation of bioluminescence in single-celled algae, etc  
57 (Castillo et al., 2015).

58 Hv1 channels are formed by a protein fold that is structurally equivalent to the voltage-  
59 sensing domains (VSDs) of canonical voltage-gated channels. The VSD is formed by a bundle  
60 of four antiparallel alpha helices (Takeshita et al., 2014b). The proton conductance of the  
61 single Hv1 channels is very small (Cherny et al., 2003), so much so that single-channel  
62 recordings are not possible. This has contributed to the proton permeation mechanism being

63 the least understood property of these channels. However, voltage-sensing is thought to  
64 occur through the interaction of charged amino acid side chains with the electric field,  
65 leading to outward movement of the fourth domain or S4, in a similar fashion to other  
66 voltage-sensing domains (Carmona et al., 2018; De La Rosa and Ramsey, 2018). This outward  
67 movement of the S4 is coupled to protons moving through the VSD in a manner that is not  
68 completely understood (Randolph et al., 2016).

69 The range of voltages over which channel activation occurs is strongly modulated by the  
70 transmembrane proton gradient, characterized by:  $\Delta\text{pH} = \text{pH}_o - \text{pH}_i$  i.e., the difference  
71 between external and internal pH. In the majority of known H<sub>v</sub>1 channels, the voltage at  
72 which half the channels are activated, the V<sub>0.5</sub> or the apparent threshold for channel opening  
73 (V<sub>Thr</sub>), shifts by roughly 40 mV per unit of  $\Delta\text{pH}$ . Thus, the pH gradient strongly biases the  
74 voltage-independent free energy of channel activation (Cherny et al., 1995). With few  
75 exceptions, channel activation occurs at voltages that are more positive than the reversal  
76 potential for protons, implying that protons are always flowing outward under steady-state  
77 conditions. The fact that most H<sub>v</sub>1s mediate outward currents is the reason these channels  
78 are mostly involved in reversing intracellular acidification or producing voltage-dependent  
79 cytoplasmic alkalization (Lishko and Kirichok, 2010; DeCoursey, 2013).

80 Although a number of studies have delineated the physiological roles of H<sub>v</sub>1 voltage-gated  
81 proton channels in vertebrate cells (DeCoursey, 2013), less is known about their role in  
82 invertebrates. They are potential mediators in processes that are critically dependent on  
83 proton homeostasis. As an example, they have been shown to be involved in regulating the  
84 synthesis of the calcium carbonate skeleton in coccolithophores, calcifying unicellular  
85 phytoplankton (Taylor et al., 2011).

86 A critical geochemical process facilitated by biology is calcification in corals. Scleractinian or  
87 stony corals are organisms in the phylum Cnidaria that deposit calcium carbonate in the form  
88 of aragonite to build an exoskeleton. This process has been shown to be modulated by the  
89 pH of the solution in which calcium carbonate is precipitated, the so called calcicoblastic  
90 liquor of fluid (Allemand et al., 2011). The molecular details of pH regulation in corals and  
91 its implications for coral calcification are not understood. Although involvement of proton-  
92 pumps has been postulated and is likely to be part of proton transport in corals (Tresguerres

93 et al., 2017), we hypothesized that proton channels might be fundamental to this  
94 physiological process and also required for calcification in hard corals. Here we report the  
95 presence of genes encoding for H<sub>v</sub>1 channels in two species of reef-building corals and we  
96 clone and characterize the biophysical properties of these channels in an expression system  
97 using patch-clamp electrophysiology. The demonstration of the presence of voltage-gated  
98 proton channels in corals is an initial step to a deeper understanding of coral calcification  
99 and its dysregulation under ocean acidification conditions. We show that some of the coral  
100 H<sub>v</sub>1's biophysical properties are different from other known proton channels and this  
101 behavior make them interesting models to try to understand some basic biophysical  
102 mechanisms in these channels. To explain this behavior, we develop a novel activation model  
103 to describe voltage- and pH-dependent gating that has general applicability to H<sub>v</sub>1 channels.

104

105

## 106 **Materials and methods**

107 *Identification of H<sub>v</sub>1 sequences and cloning.* The transcriptome of the Indo-Pacific coral  
108 *Acropora millepora* (Moya et al., 2012) was searched for sequences coding for putative  
109 voltage-sensing residues present in canonical H<sub>v</sub>1 channels with the form: RxxRxxRIL, which  
110 corresponds to the S4 segment, an essential part of H<sub>v</sub>1 channels and other voltage-sensitive  
111 membrane proteins. Blast searches detected four sequences that we identified as belonging  
112 to a putative proton-permeable channel. The GenBank accession numbers for these are:  
113 XM\_015907823.1, XM\_015907824.1, XM\_029346499.1 y XM\_029346498.1. We designed  
114 two pairs of oligonucleotides to amplify two of these sequences (Table 1). Total RNA was  
115 extracted from tissue from fragment of *Acropora millepora* obtained from a local salt-water  
116 aquarium provider. RNA was extracted by dipping the whole fragment for 2 min in 5 ml of  
117 solution D (4 M guanidinium thiocyanate, 25 mM sodium citrate, 5 % sarkosyl and 0.1 M 2-  
118 mercaptoethanol). After incubation, tissue was removed by gently pipetting the solution for  
119 2 min. At this point, the calcareous skeleton was removed and RNA extraction continued  
120 according to (Chomczynski and Sacchi, 1987). Total RNA (1 µg) from *A. millepora* was used  
121 for RT-PCR, employing oligo dT and SuperScripII reverse transcriptase (Invitrogen).  
122 Complementary DNA obtained from RT-PCR was used in three PCR reactions using oligos:  
123 1) AcHv1Nter5' and 3'; 2) AcHv1Cter5' and 3' and, 3) AcHv1Nter5' and AcHv1Cter3' (Table

124 1). The Platinum Pfx DNA polymerase (Invitrogen) was used for amplification according to  
125 the manufacturer's instructions. 1  $\mu$ l of Taq DNA polymerase (Invitrogen) was used for 10  
126 min at 72 °C to add a poly A tail at 5' and 3' ends and facilitate cloning into the pGEM-T vector.  
127 The PCR reaction 3 gave rise to a full open reading frame (ORF) containing AmH<sub>v</sub>1. New  
128 oligos AcHv1Nter5' and AcHv1Cter3' containing restriction sites Kpn1 and Not1 respectively  
129 were used to re-amplify the ORF in pGEM-T and subclone it into pcDNA3.1 for heterologous  
130 expression.

131 The H<sub>v</sub>1 channel from *A. palmata* was cloned from a fragment of an adult specimen collected  
132 in the Limones Reef off of Puerto Morelos, Mexico. RNA extraction from small coral pieces  
133 was carried out by flash freezing in liquid nitrogen and grinding the frozen tissue. All other  
134 cloning procedures were as for *A. millepora*. All clones were confirmed by automatic  
135 sequencing at the Molecular Biology Facility of the Instituto de Fisiología Celular at UNAM.

136  
137 *Heterologous expression of AmH<sub>v</sub>1.* The cloned AmH<sub>v</sub>1 was expressed in HEK293 cells.  
138 HEK293 cells were grown on 100 mm culture dishes with 10 ml of Dulbecco's Modified Eagle  
139 Medium (DMEM, Invitrogen) containing 10 % fetal bovine serum (Invitrogen) and 100  
140 units/ml-100  $\mu$ g/ml of penicillin-streptomycin (Invitrogen), incubated at 37°C in an  
141 incubator with 5.2 % CO<sub>2</sub> atmosphere. When cells reached 90 % confluence, the medium was  
142 removed, and the cells were treated with 1 ml of 0.05 % Trypsin-EDTA (Invitrogen) for 5  
143 min. Subsequently, 1 ml of DMEM with 10 % FBS was added. The cells were mechanically  
144 dislodged and reseeded in 35 mm culture dishes over 5x5 mm coverslips for  
145 electrophysiology or in 35 mm glass bottom dishes. In both cases, 2 ml of complete medium  
146 were used. Cells at 70 % confluence were transfected with pcDNA3.1-AmH<sub>v</sub>1 prepared from  
147 a plasmid midiprep, using jetPEI transfection reagent (Polyplus Transfection). For patch-  
148 clamp experiments, pEGFP-N1 (BD Biosciences Clontech) was cotransfected with the  
149 channel DNA to visualize successfully transfected cells via their green fluorescence.  
150 Electrophysiological recordings were done one or two days after transfection.

151 *Electrophysiology.* Proton current recordings were made from HEK293 cells expressing  
152 pcDNA3.1-AmH<sub>v</sub>1 in the inside-out, whole-cell and outside-out configurations of the patch-  
153 clamp recording technique. For whole-cell and inside-out recordings, the extracellular

154 solution (bath and pipette, respectively) was (in mM): 80 TMA-HMESO<sub>3</sub>, 100 buffer (MES:  
155 pH 5.5, 6.0 and 6.5; HEPES: pH 7.0, 7.5), 2 CaCl<sub>2</sub>, 2 MgCl<sub>2</sub> and pH adjusted NMDG/TMAOH  
156 and HCl. The intracellular solution (pipette and bath respectively) was (in mM): 80 TMA-  
157 HMESO<sub>3</sub>, 100 buffer (MES: pH 5.5, 6.0 and 6.5; HEPES: pH 7.0, 7.5), 1 EGTA and pH adjusted  
158 NMDG/TMAOH and HCl.

159 *Conditions for recording zinc effects.* The effect of zinc was evaluated in outside-out patches  
160 at a ΔpH of 1. The bath solution composition was (in mM): 100 TMA-HMESO<sub>3</sub>, 100 HEPES, 8  
161 HCl, 2 CaCl<sub>2</sub>, 2 MgCl<sub>2</sub>, and the indicated concentration of ZnCl<sub>2</sub>. The pipette solution was (in  
162 mM): 100 TMA-MESO<sub>3</sub>, 100 MES, 8 HCl, 10 EGTA and 2 MgCl<sub>2</sub>. Both solutions were adjusted  
163 to pH 7 and pH 6 respectively with TMA-OH/HCl. Patches were placed in front of a perfusion  
164 tube that was gravity-fed with the appropriate solution. Tubes were changed with a home-  
165 built rapid perfusion system.

166 Macroscopic currents were low-pass filtered at 2.5 kHz, sampled at 20 kHz with an Axopatch  
167 200B amplifier (Axon Instruments, USA) using an Instrutech 1800 AD/DA board (HEKA  
168 Elektronik, Germany) or an EPC-10 amplifier (HEKA Elektronik, Germany). Acquisition  
169 control and initial analysis was done with PatchMaster software. Pipettes for recording were  
170 pulled from borosilicate glass capillaries (Sutter Instrument, USA) and fire-polished to a  
171 resistance of 4-7 MΩ when filled with recording solution for inside- and outside-out  
172 recordings and 1-3 MΩ for whole-cell. The bath (intracellular) solutions in inside-out patches  
173 were changed using a custom-built rapid solution changer. For whole-cell recordings all the  
174 bath solution was exchanged to manipulate pH. In some recordings, linear current  
175 components were subtracted using a p/4 subtraction protocol.

176  
177 *Data analysis.* Conductance, G, was calculated from I-V relations assuming ohmic  
178 instantaneous currents, according to:

$$179 \quad I(V) = G \cdot (V - V_{rev})$$

180 The normalized conductance-voltage (G-V) relations were fit to a Boltzmann function  
181 according to equation 1:

182 
$$\frac{G}{G_{max}} = \frac{1}{1 + \exp\left(\frac{q(V - V_{0.5})}{K_B T}\right)}$$
 Equation 1.

183 Here,  $V_{0.5}$  is the voltage at which  $G/G_{max} = 0.5$ ,  $q$  is the apparent gating charge (in elementary  
184 charges,  $e_0$ ) and  $K_B$  is the Boltzmann constant and  $T$  temperature in Kelvin (22°C).

185 The time constant of activation was estimated via a fit of the second half of currents to the  
186 equation:

187 
$$I(t) = I_{ss} \cdot \left(1 - e^{\left(\frac{-(t-\delta)}{\tau}\right)}\right)$$
 Equation 2.

188 Where  $I_{ss}$  is the amplitude of the current at steady-state,  $\delta$  is the delay of the exponential with  
189 respect to the start of the voltage pulse and  $\tau$  is the time constant, both with units of ms. The  
190 voltage-dependence of  $\delta$  and  $\tau$  were estimated from a fit to equation:

191 
$$k(V) = k(0)e^{(-Vq_k/K_B T)}$$
 Equation 3.

192 Where  $k$  stands for  $\delta$  or  $\tau$  and  $k(0)$  is the value of either parameter at 0 mV.

193 Currents in the presence of zinc were normalized to the current before application of the ion  
194 to obtain a normalized fraction of current blocked as:  $F_B = 1 - I/I_{max}$ . The zinc dose response  
195 curve was fitted to Hill's equation in the form:

196 
$$F_B = \frac{1}{1 + \left(\frac{K_D}{[Zn^{2+}]_o}\right)^{n_H}}$$
 Equation 4.

197  $K_D$  is the apparent dissociation constant,  $[Zn^{2+}]_o$  is the extracellular zinc concentration and  
198  $n_H$  is the Hill coefficient.

199

## 200 Results

201 We have identified the presence of short DNA sequences in the genome of the Indo-Pacific  
202 reef-building coral *Acropora millepora*, that correspond to a gene encoding the H<sub>v</sub>1 voltage-  
203 activated proton-selective ion channel (Ramsey et al., 2006; Sasaki et al., 2006). We  
204 proceeded to clone this gene from mRNA obtained from tissue of a small specimen of *A.*  
205 *millepora* and refer to this sequence as AmH<sub>v</sub>1 or H<sub>v</sub>1-type proton channel of *Acropora*  
206 *millepora*. As expected, the protein sequence has similarity to several other H<sub>v</sub>1 genes from  
207 varied organisms. The least degree of conservation appears when comparing this sequence  
208 to the dinoflagellate *Karlodinium veneficum* H<sub>v</sub>1 channel (Figure 1A). Secondary structure  
209 prediction suggests that AmH<sub>v</sub>1 is a canonical H<sub>v</sub>1 channel formed by a voltage-sensing

210 domain with four transmembrane segments. The protein sequence was used for 3D  
211 modeling using the SWISS MODEL server (Waterhouse et al., 2018), which produced models  
212 based on the H<sub>v</sub>1 chimera structure (Takeshita et al., 2014a) and the Kv1.2 potassium  
213 channel voltage-sensing domain (Long et al., 2005). This structural model is shown in Figure  
214 1B. The predicted model indicates a shortened N-terminal region, four transmembrane  
215 domains and a long C-terminal helix. This helix is predicted to engage in a coiled-coil  
216 (Paircoil2 (McDonnell et al., 2006) as has been shown in human (hH<sub>v</sub>1) and in the sea squirt  
217 *Ciona* VSOP/H<sub>v</sub>1 (Sasaki et al., 2006).

218 A search of available transcriptomes from several coral species allowed us to detect the  
219 presence of sequences that seem to correspond to H<sub>v</sub>1 channels. This suggests that H<sub>v</sub>1  
220 proton channels might be found in many families of scleractinian corals (Supplementary  
221 Figure 1).

222 We were interested in knowing if the same gene is present in a closely related species from  
223 the Caribbean Sea. Thus, we used the same primers to clone the H<sub>v</sub>1 channel from *Acropora*  
224 *palmata*, a widespread coral in the same family and which we call ApH<sub>v</sub>1. The amino acid  
225 sequence is almost identical to AmH<sub>v</sub>1 (Supplementary Figure 2), the greatest divergence is  
226 found between a few amino acid residues in the C-terminal region. This result suggests that  
227 despite the large biogeographic difference, these two genes have not diverged significantly.  
228 The ApH<sub>v</sub>1 sequence also gives rise to fast-activating voltage-gated proton currents  
229 (Supplementary Figure 2).



A

```

AcHv1 -----MIDARTRRSSMDDQLPADELKEMGQPPTAAVM-----
N.vectensis -----MESDNQQLVGLVFDTSLSGERAMDKEIEVEVGD-----
C.sculpturatus -----MKMDSGQEKNNISVKKVENAKEDC-----
Human MATWDEKAVTRRAKVAPAERMSKFLRHFTVVGDDYHAWNINYKKWENEEEEEEPPPT
M.musculus MTSHDPKAVTRRTKVAPT KRMSRFLKHFTVVGDDYHTWNVYKKWENEEEEEE---PAP
K.veneficum -----MDRILHHAHVHTVHTSKSARDAEGHGTWQSKLNEALN-----

                                         S1
AcHv1 -----ASTVCLTEDDTECPANKNHREKLNELLHGDKIQYAIIVLVIIIDIIIVIAEL
N.vectensis -----GGGDAQVVSSTPCWHILKDRPRLCEIIHGQKAQYTIIALVIIDCIIVIAEL
C.sculpturatus -----ISASTDFEVDVLRPYITFQERLCKILHSHKQVVIISLVIFDCLLVISEL
Human PVS GEEGRAAAPDVAPAPGPAPRAPLDFRGLRKLFSHRFQVIIICLVVLDALLVLAEL
M.musculus TSAEGEGNAEGPD AEGSASTPRQSLDFRSRLRKLFSHRFQVIIICLVVLDALLVLAEL
K.veneficum -----SSKVHTILNVLICDLMTVIIIGMLLEQYYSDSQVQGLTEAFKDCLEKRTFC
                                         : * : .. * : :

                                         S2 S3
AcHv1 VLDLRAGSEH-HDN-SASHVLHYISIAILSVFMIELELLKIYAMGFTFFKHKMEVFDGFVI
N.vectensis LVDLEILKVH-HDN-PAPHILHDVSIAILSLFPIELIVKIYAMGMEFFHKKLEVFVDFGIVV
C.sculpturatus MIDDLEIVPLG-DEHHIAPHVLHYMSIFILSLFPIEISAKIYAFRKEFFLHKKLEVFDAIVV
Human ILDLKIQPD-KNN-YAAMVFHYMSITILVFFMMEIIFKLFVFRLEFFHKKFEILD AVVV
M.musculus LLDLKIIEPD-EQD-YAVTAFHYMSPAIVVFFMLEIFPKIFVFRLEFFHKKFEILD AVVV
K.veneficum PDPShLAHYGNHDLHEWAERM EYASLAILLIFLLENMLLVLANGCRFFANPFHILDIVVV
                                         . : . * : * * . * : * : . * : : : * : * :

                                         S4
AcHv1 IVSFALDIAFSNEQGGVDGVS LIVLLRWRVTRIVNGIILSVQMRAEKKVQAVMKENAEAL
N.vectensis IVSFALDIAFSGGN-AEGASLLIILRLWRVTRIVNGIILSVKMQDEKKIHLHVKVIEEL
C.sculpturatus VLSFSLDIAFRNSSGAINGSGLIILRLWRVARI LNGIVLSVKTQAEHKLKSKETQLREAV
Human VVSFILDIVLLFQEHQFEALGLLILLRLWRVARIINGIISVKT RSEQRLLRKLQMN VQL
M.musculus VVSFVLDLVL LFKSHHFEALGLLILLRLWRVARIINGIISVKT RSEQRILRLQINIQL
K.veneficum VVSVGFELQGLGEGHDAGIGLVVFARTWRFI RLGHIHEMHEEHEAEDHGHRVSDAAG
                                         : * . : : . . * : : * * . * : * * : : : . .

AcHv1 KTELEQLKSKCAQLESELTTLKQS-----
N.vectensis QEELDRLKTRNAELENELKTLKGTKEEPVAEEATT-----
C.sculpturatus EQELAKCRNYCAALEQEVESLRSVLMNMIKELPPTVINKPVLQHNTVNVVAEVN NATVH
Human AAKIQHLEFSCSEKEQEIERLNKLLRQHGLLGEVN-----
M.musculus ATKIQHLEFSCSEKEQEIERLNKLLKQNGLLGDVN-----
K.veneficum SLEAPLQKGSFEQHAKGTSGVHARSQASSNREGREGCCVQ-----
                                         : . . . : . :

AcHv1 -----
N.vectensis -----
C.sculpturatus YSNIM
Human -----
M.musculus -----
K.veneficum -----
    
```

B

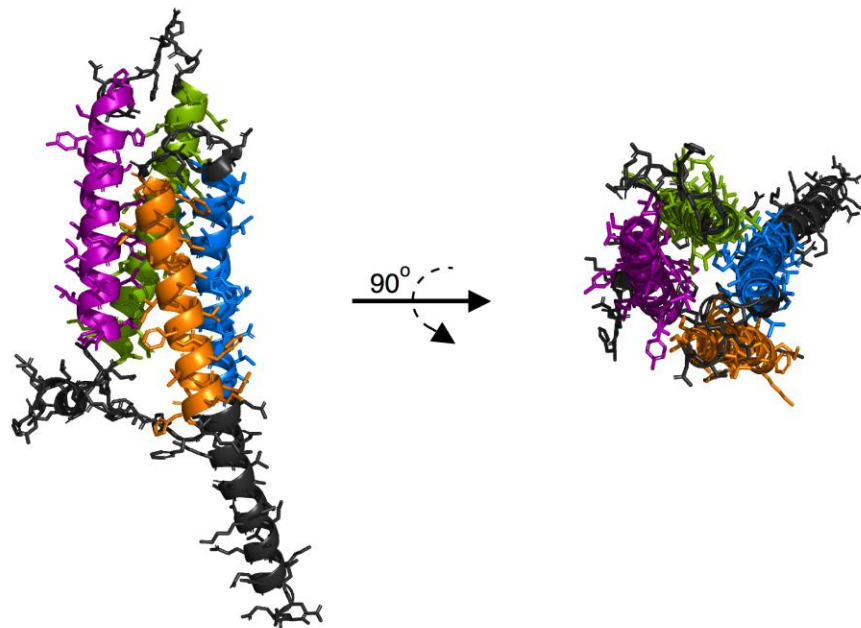

Figure 1

231 **Figure 1. Protein sequence alignment of the *Acropora millepora* H<sub>v</sub>1 (AmH<sub>v</sub>1) channel**  
232 **with selected H<sub>v</sub>1s from other organisms.** A) Amino acid sequence alignment of AmH<sub>v</sub>1  
233 with other known H<sub>v</sub>1 orthologues. The predicted transmembrane domains are shown in  
234 colored letters. Stars under the sequence indicate identical amino acids. Double dots indicate  
235 conserved amino acids. Single dots indicate charge reversals or amino acids with divergent  
236 polarity. B) Predicted structural topology of AmH<sub>v</sub>1. Transmembrane domains are colored  
237 to correspond with the sequences in A. The left panel is the view parallel to the membrane  
238 while the right panel is the view from the top (extracellular) side.

239  
240

#### 241 ***Functional expression of AmH<sub>v</sub>1. Voltage-dependence and kinetics.***

242 The cDNA of AmH<sub>v</sub>1 was cloned in the pcDNA3 expression vector and transfected into  
243 HEK293 cells. Under whole-cell conditions we recorded large voltage-dependent outward  
244 currents. Figure 2A shows a family of such currents. The data suggest that these currents  
245 were carried mostly by protons, since the reversal potential, measured from a tail current  
246 protocol, closely followed the equilibrium potential for protons, as given by the Nernst  
247 equation (Figure 2B).

248 The voltage-dependence of channel gating was estimated from a fit of the normalized  
249 conductance vs. voltage to equation 1. The steepness of the curve corresponds to an apparent  
250 charge of  $\sim 2 e_0$ , comparable to other H<sub>v</sub>1's under similar recording conditions (Figure 2C).

251 Interestingly, these channels seem to activate rapidly. This is apparent from the current  
252 traces, which reach a steady-state within a few hundred ms (Figure 2A), as quantified in  
253 Figure 2D. Equation 3 estimates two parameters, an activation time constant ( $\tau$ ) and a delay  
254 ( $\delta$ ). Both the time constant and the delay are similarly voltage-dependent at positive  
255 potentials. The existence of a delay in the time course implies that activation is a multiple  
256 state process. The delay magnitude is smaller than the time constant at all voltages, which  
257 can be interpreted to mean that the rate limiting step for opening comes late in the activation  
258 pathway (Schoppa and Sigworth, 1998).

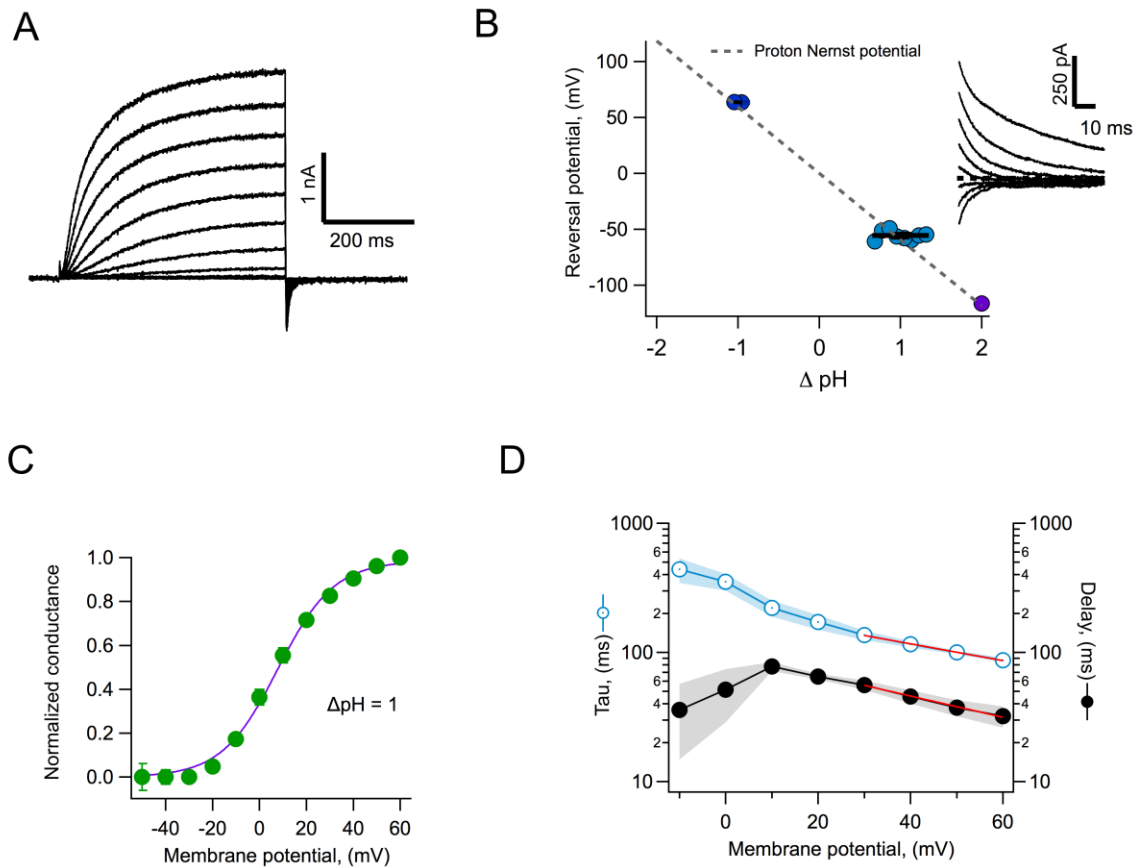

Figure 2

259  
 260 **Figure 2. Proton currents mediated by AmH<sub>v</sub>1 expressed in HEK 293 cells.** A) Typical  
 261 proton current family elicited by depolarizing pulses from -50 to 60 mV in 10 mV intervals.  
 262 The duration of the pulses is 500 ms. Linear current components have been subtracted. B)  
 263 Reversal potential of currents as a function of the pH gradient. Symbols are individual data  
 264 and the black horizontal lines are the mean. The dotted line is the expected reversal potential  
 265 as predicted by the Nernst equation. The inset shows a tail current family from which  
 266 instantaneous IV curves were extracted to measure the reversal potential. Recordings  
 267 shown in A and B were obtained in the whole-cell configuration. C) Normalized conductance-  
 268 voltage curve at  $\Delta \text{pH} = 1$ . The red curve is the fit to equation 1 with parameters  $V_{0.5} = 7.85$   
 269 mV,  $q = 2.09 e_0$ . Circles are the mean and error bars are the s.e.m. ( $n = 7$ ). D) Kinetic  
 270 parameters of activation. Activation time constant and delay estimated from fits of current  
 271 traces to equation 2. Circles are the mean and the s.e.m. is indicated by the shaded areas ( $n$   
 272 = 6). The voltage-dependence of the delay and tau of activation were estimated from a fit to

273 equation 3, which appears as the red curve. Parameters are:  $\delta(0) = 98.2$  ms,  $q_{\delta} = 0.47 e_0$ . The  
274 voltage-dependence parameters for tau are:  $\tau(0) = 212$  ms,  $q_{\tau} = 0.37 e_0$ .

275

### 276 ***Comparison to human H<sub>v</sub>1 channel properties.***

277 Human H<sub>v</sub>1 is probably the best characterized of the voltage-gated proton channels  
278 (Musset et al., 2008), so we compared some of the properties of AmH<sub>v</sub>1 with hH<sub>v</sub>1. AmH<sub>v</sub>1  
279 channels activate faster than their human counterpart. Figure 3 compares the activation  
280 kinetics of these two channels under the same conditions. Steady-state is apparently  
281 reached sooner after a voltage pulse in AmH<sub>v</sub>1 (Figure 3A) when compared to hH<sub>v</sub>1 (Figure  
282 3B). The slower kinetics of the human orthologue is also evidenced in the more sluggish  
283 deactivation tail currents (Figure 3B). The range of voltages over which activation happens  
284 is also different between the two channels, with the coral H<sub>v</sub>1 channel activating 40 mV  
285 more negative than the human clone (Figure 3C. Notice that the proton gradient is the same  
286 in these recordings). Even though AmH<sub>v</sub>1 activates at more negative voltages, the  
287 activation range is still more positive than the proton reversal potential, thus coral proton  
288 currents activated by depolarization, in the steady state and at least as expressed in  
289 HEK293 cells, are always outward.

290 The faster kinetics of AmH<sub>v</sub>1 is clearly evidenced when the time constant of activation,  $\tau$ ,  
291 estimated using fits of the activation time course to equation 2, is compared for coral and  
292 human H<sub>v</sub>1 channels. AmH<sub>v</sub>1 is almost 10-fold faster at 0 mV and over a range of positive  
293 voltages (Figure 3D).

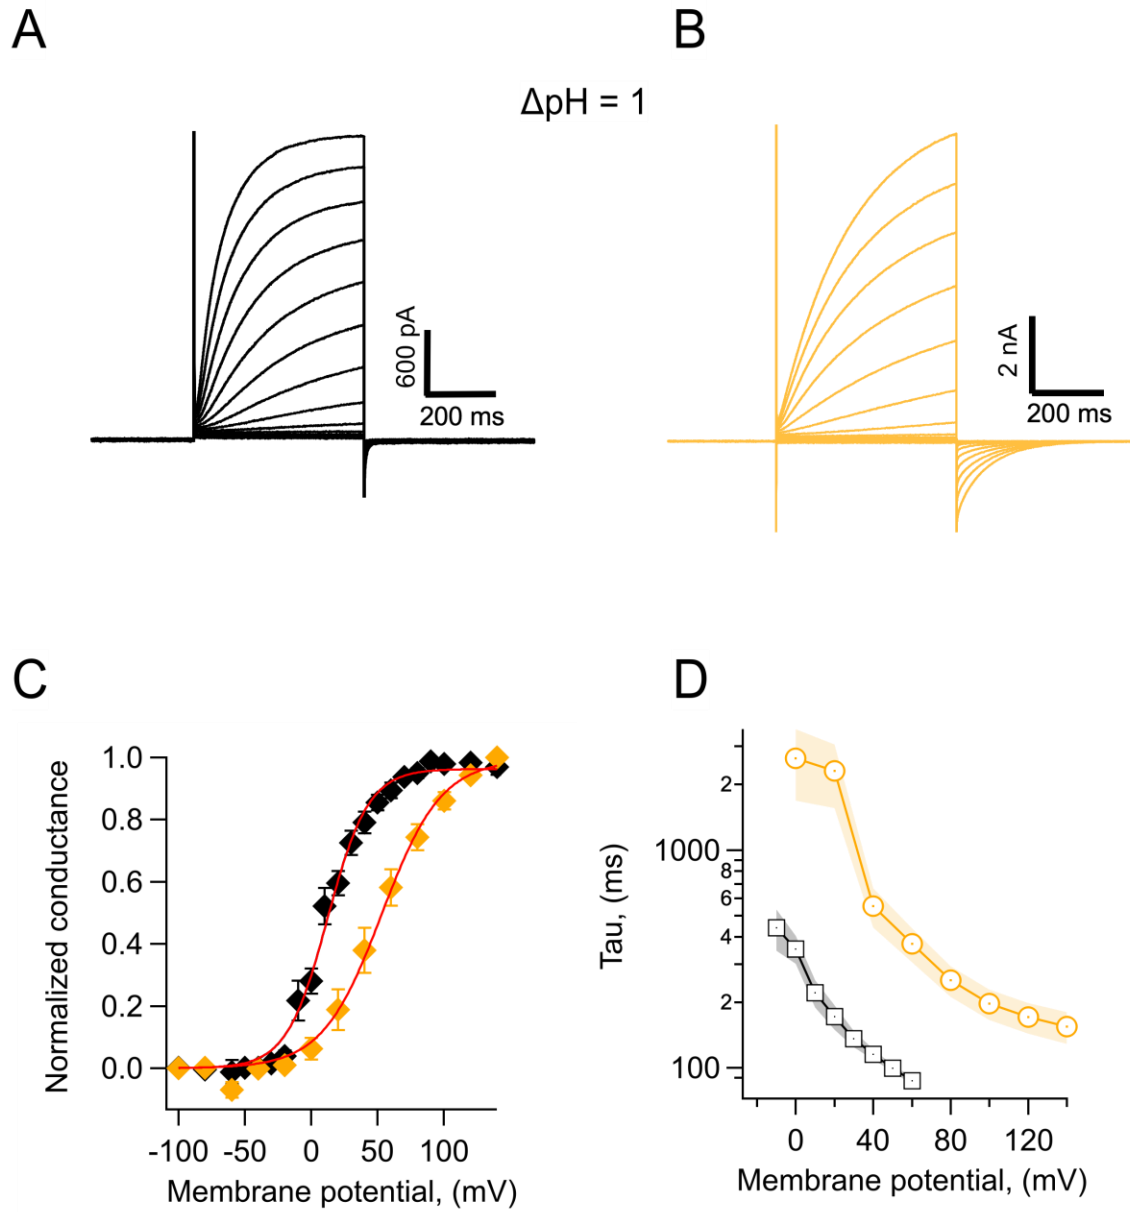

Figure 3

294

295 **Figure 3. Coral  $H_v1$  channels are faster and activate more readily than their human**

296 **counterpart.** A) AmH<sub>v1</sub> currents in response to voltage-clamp pulses from -100 to 120 mV.

297 B) Currents through hH<sub>v1</sub> channels in response to voltage-clamp pulses from -100 to 120

298 mV. Recordings shown in A and B were obtained in whole-cell the configuration. C)

299 Comparison of the conductance-voltage relationship for both channels. Black diamonds are  
300 the mean  $G/G_{\max}$  for AmH<sub>v</sub>1 and yellow diamonds for hH<sub>v</sub>1. The error bars are the s.e.m. (n=  
301 3, for both channels). The continuous red curves are fits to equation 1. The fitted parameters  
302 are: AmH<sub>v</sub>1,  $q = 1.62 e_0$ ,  $V_{0.5} = 12.2$  mV; hH<sub>v</sub>1,  $q = 1.11 e_0$ ,  $V_{0.5} = 53.1$  mV. D) The activation time  
303 constant estimated from fits of currents to equation 2. Circles are the mean for hH<sub>v</sub>1 and  
304 squares for AmH<sub>v</sub>1. The shaded areas are the s.e.m. (n= 3, for both channels).

305

### 306 ***Effects of the pH gradient on gating***

307 Both native and cloned voltage-gated proton channels are characteristically modulated by  
308 the pH gradient (Cherny et al., 1995; Sasaki et al., 2006; Ramsey et al., 2006). We carried out  
309 experiments to investigate the modulation of the coral H<sub>v</sub>1 channels by different pH  
310 gradients. We first recorded whole-cell currents at various  $\Delta$ pH and estimated the voltage-  
311 dependence of the conductance. These G-V curves were fitted to equation 2 to obtain the  
312 voltage of half activation,  $V_{0.5}$  and apparent gating charge,  $q$ , that determines the steepness  
313 of the fit. As is the case with other H<sub>v</sub>1 channels, the  $V_{0.5}$  shifts to negative voltages when  $\Delta$ pH  
314 is greater than 0 and to positive voltages when  $\Delta$ pH < 0 (Figure 4A). When we plot the  $V_{0.5}$  as  
315 a function of  $\Delta$ pH the relationship seems to be mostly linear over the range of  $\Delta$ pH -1 to 2.  
316 This relationship is somewhat steeper than the generally observed -40 mV/ $\Delta$ pH (Figure 4B).  
317 We tried to obtain recordings over an extended range of  $\Delta$ pH values. To this end, we  
318 performed inside-out recordings in which the composition of solutions can be better  
319 controlled, tend to be more stable and the size of currents is smaller. However, recordings  
320 were unstable at extreme pH values and we only managed to reliably extend the data to  $\Delta$ pH  
321 of -2. Figure 4C shows the summary of the inside-out recordings. We have plotted both the  
322  $V_{0.5}$  and the threshold voltage,  $V_{\text{Thr}}$ . To obtain this last parameter, we fitted the exponential  
323 rise of the G-V curve to a function of the form:

$$324 \quad G(V) = G' \cdot \exp^{qV/K_B T}$$

325  $V_{\text{Thr}}$  was calculated as the voltage at which the fit reaches 10 % of the maximum conductance.  
326 The parameter  $V_{\text{Thr}}$  should be less sensitive than  $V_{0.5}$  to the possible change in the proton  
327 gradient that can occur with large currents. It is clear from these data that at extreme values

328 the dependence of  $V_{0.5}$  or  $V_{Thr}$  on  $\Delta pH$  deviates from a simple linear relationship and instead  
329 it appears to saturate with increasing  $\Delta pH$ .

330

331

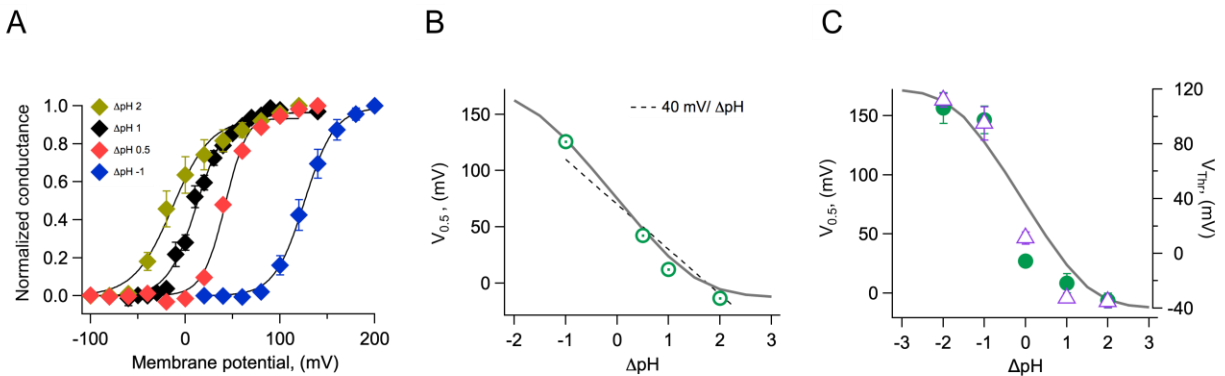

332

333

334 **Figure 4. Modulation of channel activation by the pH gradient.** A) Conductance vs.

335 voltage relationships obtained at the indicated  $\Delta pH$  values, obtained from whole-cell

336 recordings of AmH<sub>v</sub>1 proton currents. Continuous lines are fits to equation 1. B) The

337 parameter  $V_{0.5}$  was obtained from the fits in A and is displayed as a function of  $\Delta pH$ . The

338 dotted line is the 40 mV/ $\Delta pH$  linear relationship. The continuous grey curve is the prediction

339 of the allosteric model. C) Parameters  $V_{0.5}$  (green circles) and  $V_{Thr}$  (purple triangles) obtained

340 from a different set of inside-out current recordings. Data are mean  $\pm$  s.e.m. The continuous

341 grey curve is the same prediction of the allosteric model shown in B. The model parameters

342 used to generate the theoretical curve are:  $E=5 \times 10^5$ ,  $D=10^5$ ,  $C=0.0002$ ,  $K_v(0)=0.00005$ ,

343  $q_g=1.0 e_0$ ,  $pK_o=3.4$ ,  $pK_i=7$

344

### 345 ***Allosteric model of voltage and pH-dependent gating***

346 Currently, there is only one quantitative model that has been used to explain  $\Delta pH$  gating

347 of H<sub>v</sub>1 channels (Cherny et al., 1995). However, this model is heuristic and does not provide

348 mechanistic insight into the process of proton modulation of the voltage dependence of

349 proton permeable channels. In order to explain the modulation of the range of activation by

350 the proton gradient, parameterized by the  $V_{0.5}$ , we developed a structurally-inspired

351 allosteric model of voltage and proton activation. As many voltage-sensing domains, H<sub>v</sub>1 has

352 two water-occupied cavities exposed to the extracellular and intracellular media (Ramsey et  
353 al., 2010; Islas and Sigworth, 2001; Ahern and Horn, 2005). Recent evidence suggests that  
354 these cavities function as proton-binding sites through networks of electrostatic interactions  
355 (De La Rosa et al., 2018). In our model, we propose that these two proton-binding sites, one  
356 intracellular and one extracellular, allosterically modulate the movement of the voltage-  
357 sensing S4 segment and thus channel activation in opposite ways. The extracellular site is  
358 postulated as inhibitory, while the intracellular site is excitatory, facilitating voltage sensor  
359 movement. As a first approximation, we employ a simplified allosteric formalism based on a  
360 Monod-Wyman-Changeux (MWC) style model (Horrigan and Aldrich, 2002; Changeux,  
361 2012). As a simplifying assumption, in this model we assume that the voltage sensor moves  
362 in a single voltage-dependent activation step. We assume the external and an internal  
363 proton-binding sites have simple protonation given by a single  $pK_a$  value. These sites operate  
364 as two allosteric modules and are coupled to the voltage sensor according to coupling factors  
365 C and D, respectively. These binding sites in turn interact with each other through the  
366 coupling factor E. The modular representations of the model are illustrated in Figure 5A,  
367 while the full model depicting all open and closed states with all permissible transitions and  
368 the corresponding equilibrium constants for each transition is shown in Figure 5B. Full  
369 details of equations derived from these schemes are given in supplementary data.

370 This allosteric model represents a first attempt at producing a quantitative mechanistic  
371 understanding of the interaction of the voltage sensor and protons in  $H_v1$  channels.

372 From the data shown in Figure 4C, it can be seen that the model is capable of reproducing  
373 the very steep dependence of  $V_{0.5}$  on  $\Delta pH$  and importantly, the saturation of this relationship  
374 at extreme values. Some  $H_v1$  channels from other organisms show a linear dependence of  
375 gating over a large range of  $\Delta pH$  values, while others show a reduced dependence and even  
376 saturation over some range of  $\Delta pH$  (Thomas et al., 2018). Our model can explain these  
377 different behaviors as different channels having distinct values of  $pK_a$ s for the internal or  
378 external sites, differences in coupling factors or differences in the voltage-dependent  
379 parameters (Supplementary information).

380



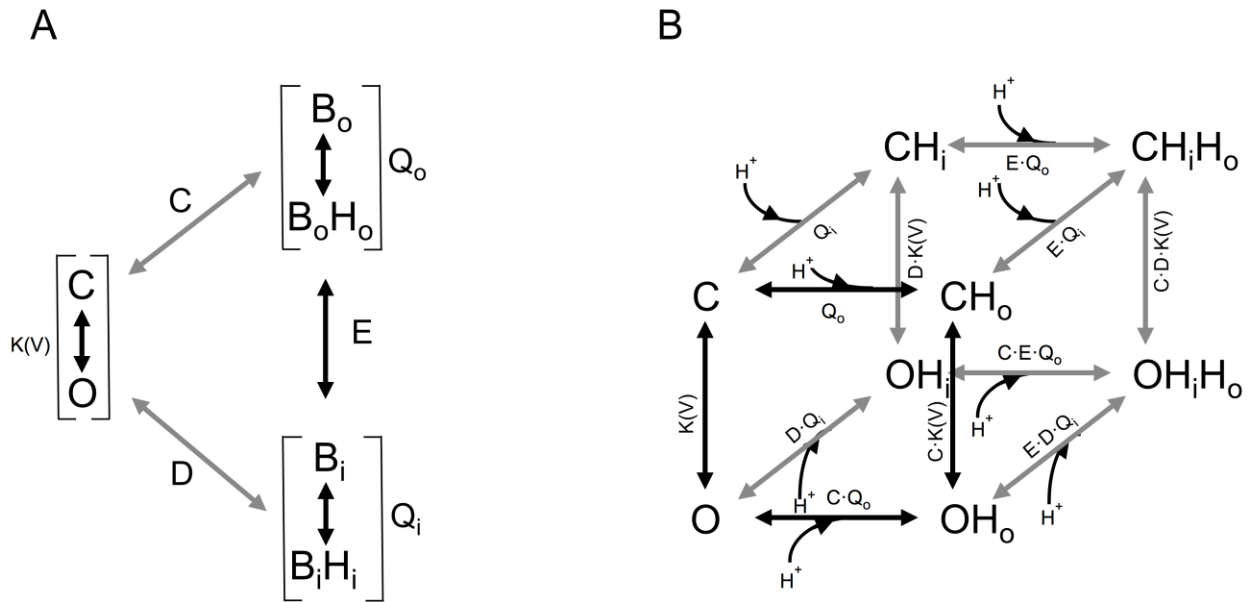

381

382 **Figure 5. Gating scheme I.** A) Modular representation of a simple MWC model; the channel  
 383 opening transition is voltage-dependent, with equilibrium constant  $K(V)$ .  $B_o$  and  $B_i$  are the  
 384 unbound states of the extracellular and intracellular proton-binding sites, respectively and  
 385  $B_oH_o$  and  $B_iH_i$  are the proton bound states of these binding sites.  $Q_o$  and  $Q_i$  are equilibrium  
 386 constants that depend on the  $pK_a$  of each of these binding states.  $C$ ,  $D$  and  $E$  are the coupling  
 387 constants between each of the indicated modules.

388 B) All the individual states implied in A are depicted, along with proton-binding states and  
 389 the appropriate equilibrium constants.  $C$ , closed states,  $O$ , open states.  $OH_x$ ,  $OH_xH_x$  and  $CH_x$ ,  
 390  $CH_xH_x$  are single or doubly proton-occupied states, where  $x$  can be  $o$  for outside or  $i$  for  
 391 inside-facing binding sites.

392

393

### 394 **Block by $Zn^{2+}$**

395 The best characterized blocker of proton channels is the divalent ion zinc (Cherny et al.,  
 396 2020; De La Rosa et al., 2018; Qiu et al., 2016). We performed experiments to determine if  
 397 Am  $H_v1$  channels are also inhibited by zinc. We found that indeed, extracellular application

398 of zinc in outside-out patches produced inhibition of the channels, reflected in reduced  
399 current amplitude (Figure 6A). Figure 6B shows average current-voltage relationships in the  
400 absence and presence of 10  $\mu\text{M}$  external zinc. It can be seen that the fraction of current  
401 blocked is not the same at every voltage, indicating that this inhibition might be voltage-  
402 dependent. The fraction of blocked channels was calculated and is plotted at each voltage  
403 along with the I-V curves (Figure 6B). It can be clearly seen that inhibition by  $\text{Zn}^{2+}$  is voltage-  
404 dependent. A simple mechanism for voltage-dependent blockage was proposed by  
405 (Woodhull, 1973). This model postulates that a charged blocker molecule interacts with a  
406 binding site in the target molecule that is located within the electric field. Fitting the data  
407 according to this model, and given that zinc is a divalent ion, its apparent binding site is  
408 located at a fraction  $\delta = 0.2$  of the membrane electric field from the extracellular side (Figure  
409 6B).

410 Zinc blockage proceeds very fast. At 1 mM the channels are blocked almost instantaneously,  
411 and the inhibition washes off very fast as well (Figure 6C). Finally, we report the dose  
412 response curve (Figure 6D). The inhibition dose response curve can be fit by a Hill equation  
413 (Equation 4) with a slope factor of near 0.5 and an apparent dissociation constant,  $K_D$  of 27  
414  $\mu\text{M}$ .

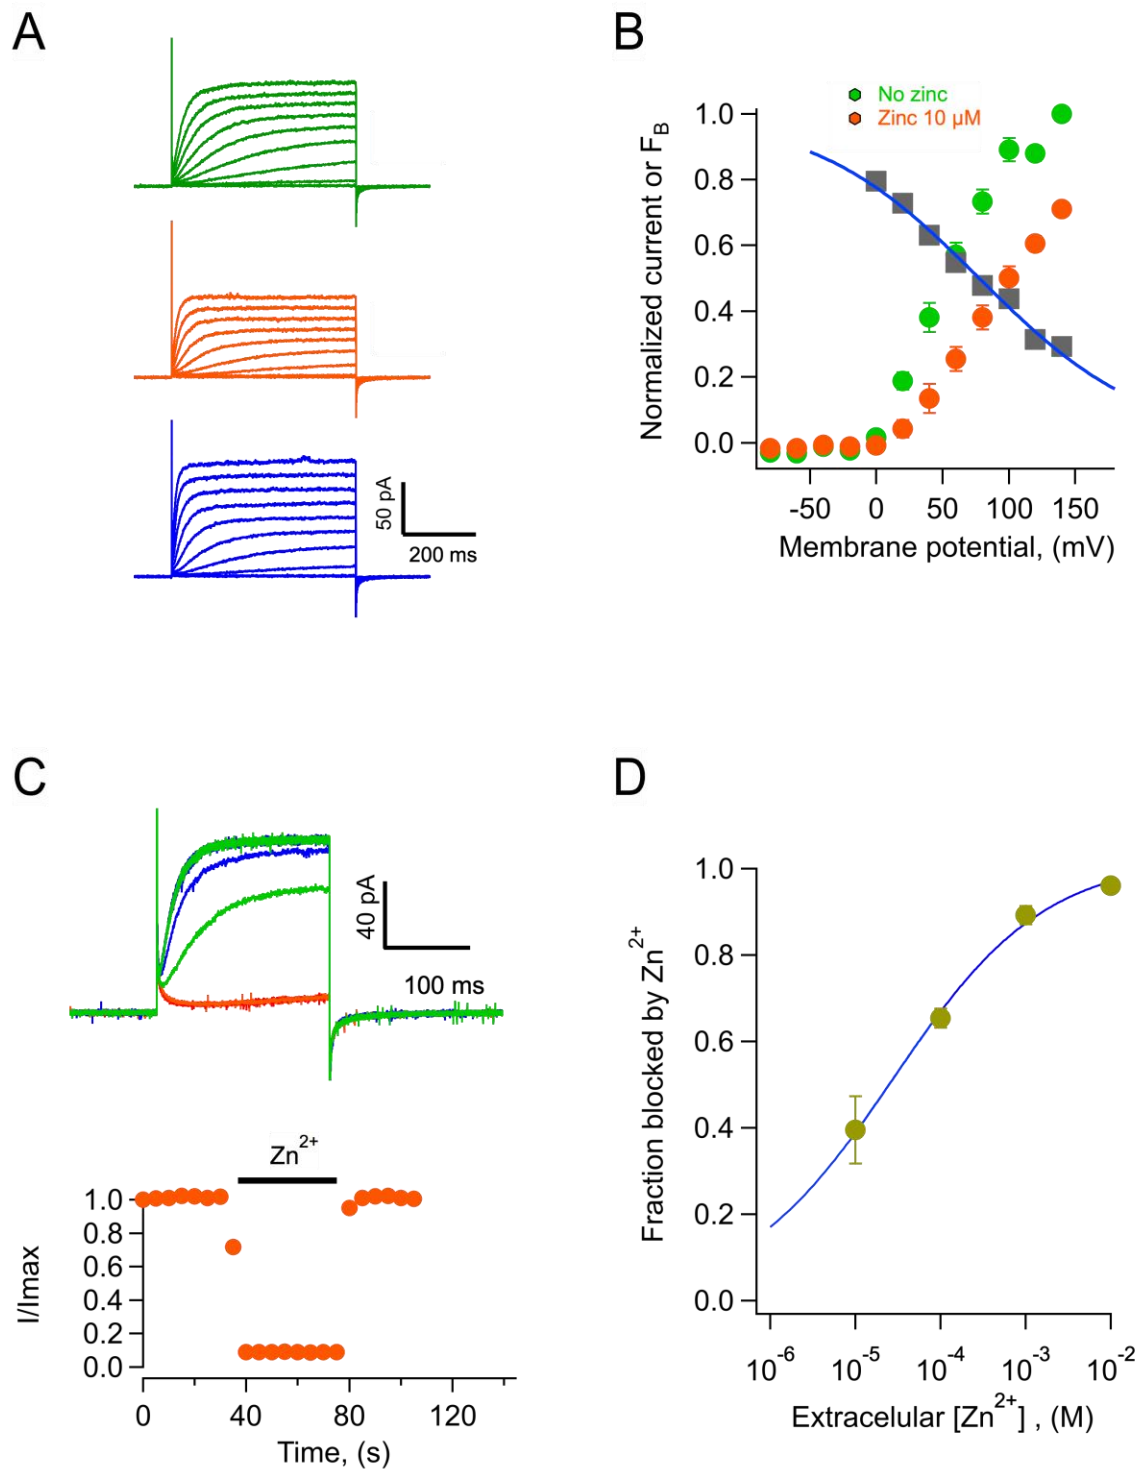

415

416 **Figure 6. Block of AmH<sub>v</sub>1 channels by extracellular zinc.** A) AmH<sub>v</sub>1-mediated currents  
417 from an outside-out patch in the absence (top), presence of 10 μM zinc (middle) and after  
418 washing of zinc (bottom). The scale bars apply to the three current families. B) Normalized  
419 current voltage relationships before and in the presence of 10 μM zinc from 4 patches as in

420 A. The grey squares are the ratio  $I_{\text{zinc}}(V)/I(V)$ , which gives the voltage-dependence of the  
421 blocking reaction. The blue curve is the fit to the Woodhull equation:

422 
$$F_B = \frac{1}{1 + e^{-\delta z(V - V_{0.5})/K_B T}}$$
, where  $F_B$  is the fraction of current blocked,  $\delta$  is the fraction of the

423 electric field where the blocker binds,  $z$  is the valence of the blocker,  $V_{0.5}$  is the potential  
424 where half of the current is blocked,  $K_B$  is Boltzmann's constant and  $T$  the temperature in  
425 Kelvin. The fitting parameters are:  $\delta=0.19$ ,  $V_{0.5}=77.6$  mV. C) The effect of zinc is fast.  
426 Application of 1 mM zinc to an outside-out patch produces almost instantaneous block of  
427 ~90 % of the current. The effect also washes off quickly upon removal of zinc. Trace colors  
428 are as in A. Voltage pulse was 100 mV applied every 5 sec. D) Dose-response curve of zinc  
429 block of AmHv1 obtained at 100 mV. The continuous curve is a fit of the data to equation 4  
430 with apparent  $K_D = 27.4$   $\mu\text{M}$  and  $n = 0.48$ .

431

432

### 433 **Discussion and conclusions**

434 A few ion transport mechanisms in reef-building corals have been described, but up to now,  
435 no ion channels have been characterized from any scleractinian species. Here we show that  
436 voltage-gated proton-permeable channels formed by the Hv1 protein are present in corals.  
437 In particular, we have cloned these channels from two species of the genus *Acropora*, *A.*  
438 *millepora* and *A. palmata*. It is interesting that the protein sequence of these proteins shows  
439 a very high degree of conservation, suggesting that, even when the two species are found in  
440 different oceans, they haven't had time to diverge substantially or alternatively, selective  
441 pressures on these channels are very similar in both species. The presence of Hv1 sequences  
442 in many other species of corals from disparate clades, suggest that Hv1 plays an important  
443 role in coral physiology.

444 Our experiments show that these coral proteins give rise to proton currents when expressed  
445 in HEK293 cells and we present a characterization of some of their biophysical properties.  
446 These channels retain the functional characteristics that have been shown to define the class  
447 in other species, such as very high selectivity for protons, activation by voltage and  
448 modulation of this activation by the proton gradient. The new channels reported here  
449 activate faster than the human Hv1 channel. It has been known that different orthologs of Hv1

450 activate with varying kinetics. For example, sea urchin, dinoflagellate and recently, fungal  
451 H<sub>v</sub>1 channels activate rapidly, while most mammalian counterparts have slow activation  
452 rates (Musset et al., 2008; Smith et al., 2011; Zhao and Tombola, 2021). A comparative study  
453 suggests that two amino acids in the S3 transmembrane segment are important  
454 determinants of kinetic differences between sea urchin and mouse H<sub>v</sub>1 (Sakata et al., 2016).  
455 The authors suggest that the time course of activation is slow in channels containing a  
456 histidine and a phenylalanine at positions 164 and 166, respectively (mouse sequence  
457 numbering). The AmH<sub>v</sub>1 has a histidine at equivalent position 132 and a methionine at 134.  
458 It is possible that this last amino acid in AmH<sub>v</sub>1 confers most of the fast kinetics phenotype.  
459 A separate work showed that a lack of the amino-terminal segment in human sperm H<sub>v</sub>1 also  
460 produced fast-activating channels (Berger et al., 2017). Interestingly, the *Acropora* channels  
461 have a shorter amino-terminal sequence, which could also contribute to their fast kinetics.  
462 One of the most interesting characteristics found in these new proton channels is their  
463 modulation by the proton gradient. As opposed to other H<sub>v</sub>1 channels, we can observe a  
464 trend towards saturation of the V<sub>0.5</sub> for activation as a function of ΔpH at extreme values of  
465 this variable. A tendency towards saturation of the V<sub>0.5</sub>-ΔpH relationship has been observed  
466 in mutants of the hH<sub>v</sub>1 channel (Cherny et al., 2015) or at negative values of ΔpH for a snail  
467 H<sub>v</sub>1 (Thomas et al., 2018), but it seems it can be fully appreciated in AmH<sub>v</sub>1. Since our model  
468 explains the observation of saturation of voltage gating at extreme values of ΔpH as a  
469 consequence of the existence of two saturable sites for proton binding, we attribute this  
470 behavior, to the large separation of pK<sub>a</sub> values for the extracellular and intracellular proton  
471 binding sites.  
472 The strength of allosteric coupling of these sites and the voltage sensor will determine if  
473 saturation is observed over a short or extended range of ΔpH values and the range of values  
474 of V<sub>0.5</sub> that a particular channel can visit. Our model should provide a framework to better  
475 understand gating mechanisms in future work.  
476 It is clear that more complicated models, with a larger number of voltage dependent and  
477 independent steps (Villalba-Galea, 2014) and coupling to protonation sites should be the  
478 next step to improve data fitting and explore voltage-and proton-dependent kinetics. In

479 particular, these types of models can help explain mutagenesis experiments exploring the  
480 nature of the protonation sites.

481

482 What is the function of voltage-gated proton channels in corals? The deposition of a  $\text{CaCO}_3$   
483 exoskeleton is one of the main defining characteristics of scleractinians, however, the ionic  
484 transport mechanisms involved in this process are mostly unknown. In order for aragonite  
485 precipitation to occur favorably, the pH of the calicoblastic fluid, right next to the skeleton is  
486 maintained at high levels, between 8.5 and 9 and above the pH of sea water (Le Goff et al.,  
487 2017). It has been posited that corals control this pH via vectorial transport of protons to the  
488 gastrodermal cavity (Jokiel, 2013). Since proton transport away from the site of calcification  
489 would incur a drastically lower intracellular pH in the cells of the aboral region, we propose  
490 that, given their ability to rapidly regulate intracellular pH (De la Rosa et al., 2016),  $\text{H}_v1$   
491 proton channels contribute by transporting protons from the cells. Thus, these proton  
492 channels would be a major component of the mechanisms of intracellular pH regulation.  
493 Given that the activation range of  $\text{H}_v1$  is controlled by the pH gradient, a large intracellular  
494 acidification would facilitate opening of these channels at the resting potential of cells, which  
495 is presumably negative.

496 The finding that coral  $\text{H}_v1$  channels retain their sensitivity to  $\text{Zn}^{2+}$ , opens the possibility of  
497 using this ion as a pharmacological tool to study the role of proton channels in pH  
498 homeostasis. It is interesting that a recent report has shown detrimental effects of zinc  
499 supplementation in coral growth (Tijssen et al., 2017), a result that could be explained by  
500 zinc inhibition of  $\text{H}_v1$ .

501 The physiological role of  $\text{H}_v1$  channels in corals might be essential in the response of these  
502 organisms to ocean acidification. We theorize that as the pH of sea water acidifies, gating of  
503  $\text{H}_v1$  should require stronger depolarization, thus hindering its capacity to transport protons  
504 from the cell. This will contribute to a diminished calcification rate and less aragonite  
505 saturation of the  $\text{CaCO}_3$  skeleton. It would be interesting and important to study the effects  
506 of acidification on  $\text{H}_v1$  physiology and pH regulation in corals in vivo. Essentially nothing is  
507 known about the electrophysiological properties of coral cells. This report represents the  
508 first time that an ion channel has been cloned and characterized in any coral and should open

509 a new avenue of research, such as uncovering the cellular and possible subcellular  
510 localization of these channels and carefully measuring their physiological role in vivo.

511

512

513 **Acknowledgments.** We would like to thank Alejandra Llorente for excellent technical  
514 assistance. This work was funded in part by grant No. IN215621 from DGAPA-PAPIIT-UNAM  
515 to L.D.I., grant No. 247765 to A.T.B. and grant No. IN200720 to T.R.

516 Author contributions. G.R-Y, performed cloning, performed heterologous expression,  
517 performed experiments, read the paper. C.C., M.A.C.-R., E.S-D., performed cloning, expression  
518 and electrophysiology experiments. L.D.I. obtained funding, conceived research, procured  
519 animals, analyzed data, wrote the paper. A.B. and E.M. procured collection permits and  
520 specimens, performed RNA extraction, revised and edited the paper. I.S.R. contributed ideas,  
521 revised and edited the paper. T.R. wrote the paper, contributed ideas.

522

523

524

525

## References

526 Ahern, C.A., and R. Horn. 2005. Focused electric field across the voltage sensor of potassium  
527 channels. *Neuron*. 48:25–29.

528 Allemand, D., É. Tambutté, D. Zoccola, and S. Tambutté. 2011. Coral calcification, cells to  
529 reefs. *Coral Reefs Ecosyst. Transit*. 119–150.

530 Berger, T.K., D.M. Fußhöller, N. Goodwin, W. Bönigk, A. Müller, N. Dokani Khesroshahi, C.  
531 Brenker, D. Wachten, E. Krause, and U.B. Kaupp. 2017. Post-translational cleavage of  
532 Hv1 in human sperm tunes pH- and voltage-dependent gating. *J. Physiol*. 595:1533–  
533 1546.

534 Carmona, E.M., H.P. Larsson, A. Neely, O. Alvarez, R. Latorre, and C. Gonzalez. 2018. Gating  
535 charge displacement in a monomeric voltage-gated proton ( $H_v1$ ) channel. *Proc.*  
536 *Natl. Acad. Sci*. 115:9240–9245. doi:10.1073/pnas.1809705115.

537 Castillo, K., A. Pupo, D. Baez-Nieto, G.F. Contreras, F.J. Morera, A. Neely, R. Latorre, and C.  
538 Gonzalez. 2015. Voltage-gated proton ( $H_v1$ ) channels, a singular voltage sensing  
539 domain. *FEBS Lett*. 589:3471–3478.

540 Changeux, J.-P. 2012. Allosterism and the Monod-Wyman-Changeux model after 50 years.  
541 *Annu. Rev. Biophys*. 41:103–133.

- 542 Cherny, V.V., V.S. Markin, and T.E. DeCoursey. 1995. The voltage-activated hydrogen ion  
543 conductance in rat alveolar epithelial cells is determined by the pH gradient. *J. Gen.*  
544 *Physiol.* 105:861–896.
- 545 Cherny, V.V., D. Morgan, B. Musset, G. Chaves, S.M. Smith, and T.E. DeCoursey. 2015.  
546 Tryptophan 207 is crucial to the unique properties of the human voltage-gated  
547 proton channel, hHV1. *J. Gen. Physiol.* 146:343–356.
- 548 Cherny, V.V., R. Murphy, V. Sokolov, R.A. Levis, and T.E. DeCoursey. 2003. Properties of  
549 single voltage-gated proton channels in human eosinophils estimated by noise  
550 analysis and by direct measurement. *J. Gen. Physiol.* 121:615–628.
- 551 Cherny, V.V., B. Musset, D. Morgan, S. Thomas, S.M. Smith, and T.E. DeCoursey. 2020.  
552 Engineered high-affinity zinc binding site reveals gating configurations of a human  
553 proton channel. *J. Gen. Physiol.* 152.
- 554 Chomczynski, P., and N. Sacchi. 1987. Single-step method of RNA isolation by acid  
555 guanidinium thiocyanate-phenol-chloroform extraction. *Anal. Biochem.* 162:156–  
556 159.
- 557 De La Rosa, V., A.L. Bennett, and I.S. Ramsey. 2018. Coupling between an electrostatic  
558 network and the Zn<sup>2+</sup> binding site modulates Hv1 activation. *J. Gen. Physiol.*  
559 150:863–881.
- 560 De La Rosa, V., and I.S. Ramsey. 2018. Gating currents in the Hv1 proton channel. *Biophys. J.*  
561 114:2844–2854.
- 562 De la Rosa, V., E. Suárez-Delgado, G.E. Rangel-Yescas, and L.D. Islas. 2016. Currents through  
563 Hv1 channels deplete protons in their vicinity. *J. Gen. Physiol.* 147:127–136.
- 564 DeCoursey, T.E. 2013. Voltage-gated proton channels: molecular biology, physiology, and  
565 pathophysiology of the HV family. *Physiol. Rev.* 93:599–652.
- 566 Horrigan, F.T., and R.W. Aldrich. 2002. Coupling between voltage sensor activation, Ca<sup>2+</sup>  
567 binding and channel opening in large conductance (BK) potassium channels. *J. Gen.*  
568 *Physiol.* 120:267–305.
- 569 Islas, L.D., and F.J. Sigworth. 2001. Electrostatics and the gating pore of Shaker potassium  
570 channels. *J. Gen. Physiol.* 117:69–90.
- 571 Jokieli, P.L. 2013. Coral reef calcification: carbonate, bicarbonate and proton flux under  
572 conditions of increasing ocean acidification. *Proc. R. Soc. B Biol. Sci.* 280:20130031.
- 573 Le Goff, C., E. Tambutté, A.A. Venn, N. Techer, D. Allemand, and S. Tambutté. 2017. In vivo  
574 pH measurement at the site of calcification in an octocoral. *Sci. Rep.* 7:1–14.



- 575 Lishko, P.V., and Y. Kirichok. 2010. The role of Hv1 and CatSper channels in sperm  
576 activation. *J. Physiol.* 588:4667–4672.
- 577 Long, S.B., E.B. Campbell, and R. MacKinnon. 2005. Crystal structure of a mammalian  
578 voltage-dependent Shaker family K<sup>+</sup> channel. *Science.* 309:897–903.
- 579 McDonnell, A.V., T. Jiang, A.E. Keating, and B. Berger. 2006. Paircoil2: improved prediction  
580 of coiled coils from sequence. *Bioinformatics.* 22:356–358.
- 581 Moya, A., L. Huisman, E.E. Ball, D.C. Hayward, L.C. Grasso, C.M. Chua, H.N. Woo, J.-P. Gattuso,  
582 S. Foret, and D.J. Miller. 2012. Whole transcriptome analysis of the coral *Acropora*  
583 *millepora* reveals complex responses to CO<sub>2</sub>-driven acidification during the  
584 initiation of calcification. *Mol. Ecol.* 21:2440–2454.
- 585 Musset, B., V.V. Cherny, D. Morgan, Y. Okamura, I.S. Ramsey, D.E. Clapham, and T.E.  
586 DeCoursey. 2008. Detailed comparison of expressed and native voltage-gated  
587 proton channel currents. *J. Physiol.* 586:2477–2486.
- 588 Qiu, F., A. Chamberlin, B.M. Watkins, A. Ionescu, M.E. Perez, R. Barro-Soria, C. González, S.Y.  
589 Noskov, and H.P. Larsson. 2016. Molecular mechanism of Zn<sup>2+</sup> inhibition of a  
590 voltage-gated proton channel. *Proc. Natl. Acad. Sci.* 113:E5962–E5971.
- 591 Ramsey, I.S., Y. Mokrab, I. Carvacho, Z.A. Sands, M.S. Sansom, and D.E. Clapham. 2010. An  
592 aqueous H<sup>+</sup> permeation pathway in the voltage-gated proton channel Hv1. *Nat.*  
593 *Struct. Mol. Biol.* 17:869.
- 594 Ramsey, I.S., M.M. Moran, J.A. Chong, and D.E. Clapham. 2006. A voltage-gated proton-  
595 selective channel lacking the pore domain. *Nature.* 440:1213–1216.
- 596 Randolph, A.L., Y. Mokrab, A.L. Bennett, M.S. Sansom, and I.S. Ramsey. 2016. Proton  
597 currents constrain structural models of voltage sensor activation. *Elife.* 5:e18017.
- 598 Sakata, S., N. Miyawaki, T.J. McCormack, H. Arima, A. Kawanabe, N. Özkucur, T. Kurokawa, Y.  
599 Jinno, Y. Fujiwara, and Y. Okamura. 2016. Comparison between mouse and sea  
600 urchin orthologs of voltage-gated proton channel suggests role of S3 segment in  
601 activation gating. *Biochim. Biophys. Acta BBA-Biomembr.* 1858:2972–2983.
- 602 Sasaki, M., M. Takagi, and Y. Okamura. 2006. A voltage sensor-domain protein is a voltage-  
603 gated proton channel. *Science.* 312:589–592.
- 604 Schoppa, N.E., and F.J. Sigworth. 1998. Activation of Shaker potassium channels: I.  
605 Characterization of voltage-dependent transitions. *J. Gen. Physiol.* 111:271–294.
- 606 Smith, S.M.E., D. Morgan, B. Musset, V.V. Cherny, A.R. Place, J.W. Hastings, and T.E.  
607 DeCoursey. 2011. Voltage-gated proton channel in a dinoflagellate. *Proc. Natl. Acad.*  
608 *Sci.* 108:18162–18167. doi:10.1073/pnas.1115405108.

- 609 Takeshita, K., S. Sakata, E. Yamashita, Y. Fujiwara, A. Kawanabe, T. Kurokawa, Y. Okochi, M.  
610 Matsuda, H. Narita, and Y. Okamura. 2014a. X-ray crystal structure of voltage-gated  
611 proton channel. *Nat. Struct. Mol. Biol.* 21:352–357.
- 612 Takeshita, K., S. Sakata, E. Yamashita, Y. Fujiwara, A. Kawanabe, T. Kurokawa, Y. Okochi, M.  
613 Matsuda, H. Narita, Y. Okamura, and A. Nakagawa. 2014b. X-ray crystal structure of  
614 voltage-gated proton channel. *Nat. Struct. Mol. Biol.* 21:352–357.  
615 doi:10.1038/nsmb.2783.
- 616 Taylor, A.R., A. Chrachri, G. Wheeler, H. Goddard, and C. Brownlee. 2011. A voltage-gated H+  
617 channel underlying pH homeostasis in calcifying coccolithophores. *PLoS Biol.*  
618 9:e1001085.
- 619 Thomas, S., V.V. Cherny, D. Morgan, L.R. Artinian, V. Rehder, S.M. Smith, and T.E. DeCoursey.  
620 2018. Exotic properties of a voltage-gated proton channel from the snail *Helisoma*  
621 *trivolvis*. *J. Gen. Physiol.* 150:835–850.
- 622 Tijssen, J., T. Wijgerde, M.C. Leal, and R. Osinga. 2017. Effects of zinc supplementation on  
623 growth and colouration of the scleractinian coral *Stylophora pistillata*. PeerJ  
624 Preprints.
- 625 Tresguerres, M., K.L. Barott, M.E. Barron, D.D. Deheyn, D.I. Kline, and L.B. Linsmayer. 2017.  
626 Cell biology of reef-building corals: ion transport, acid/base regulation, and energy  
627 metabolism. *Acid-Base Balance Nitrogen Excretion Invertebr.* 193–218.
- 628 Villalba-Galea, C.A. 2014. Hv1 proton channel opening is preceded by a voltage-  
629 independent transition. *Biophys. J.* 107:1564–1572.
- 630 Waterhouse, A., M. Bertoni, S. Bienert, G. Studer, G. Tauriello, R. Gumienny, F.T. Heer, T.A.P.  
631 de Beer, C. Rempfer, and L. Bordoli. 2018. SWISS-MODEL: homology modelling of  
632 protein structures and complexes. *Nucleic Acids Res.* 46:W296–W303.
- 633 Woodhull, A.M. 1973. Ionic blockage of sodium channels in nerve. *J. Gen. Physiol.* 61:687–  
634 708.
- 635 Zhao, C., and F. Tombola. 2021. Voltage-gated proton channels from fungi highlight role of  
636 peripheral regions in channel activation. *Commun. Biol.* 4:1–13.
- 637
- 638
- 639
- 640
- 641
- 642

643 **Table 1.**

| Oligo name      | Sequence                                 |
|-----------------|------------------------------------------|
| <u>AcHvNt5'</u> | ATGATTGATGCAAGAACCAGACGATCGAGCATGGATGAT  |
| <u>AcHvNt3'</u> | TGATCCTGCTCTCAAGTCAAGAACCAACTCAGCAATGAC  |
| <u>AcHvCt5'</u> | ATGGGATTCACATTTTCAAGCACAAATGGAGGTGTTT    |
| <u>AcHvCt3'</u> | TCAGCTTTGTTTTAATGTTGTCAATTCAGACTCCAACCTG |

644 Oligonucleotides used to clone amino and carboxy terminal partial sequences of AmH<sub>v</sub>1 from  
645 total reverse-transcribed mRNA from *A. millepora*.

646

647

648

649

650

651

652

653

654

655

656

657

658

659

660

661

662

663

664

665

666

667

668 **Supplementary materials.**

669

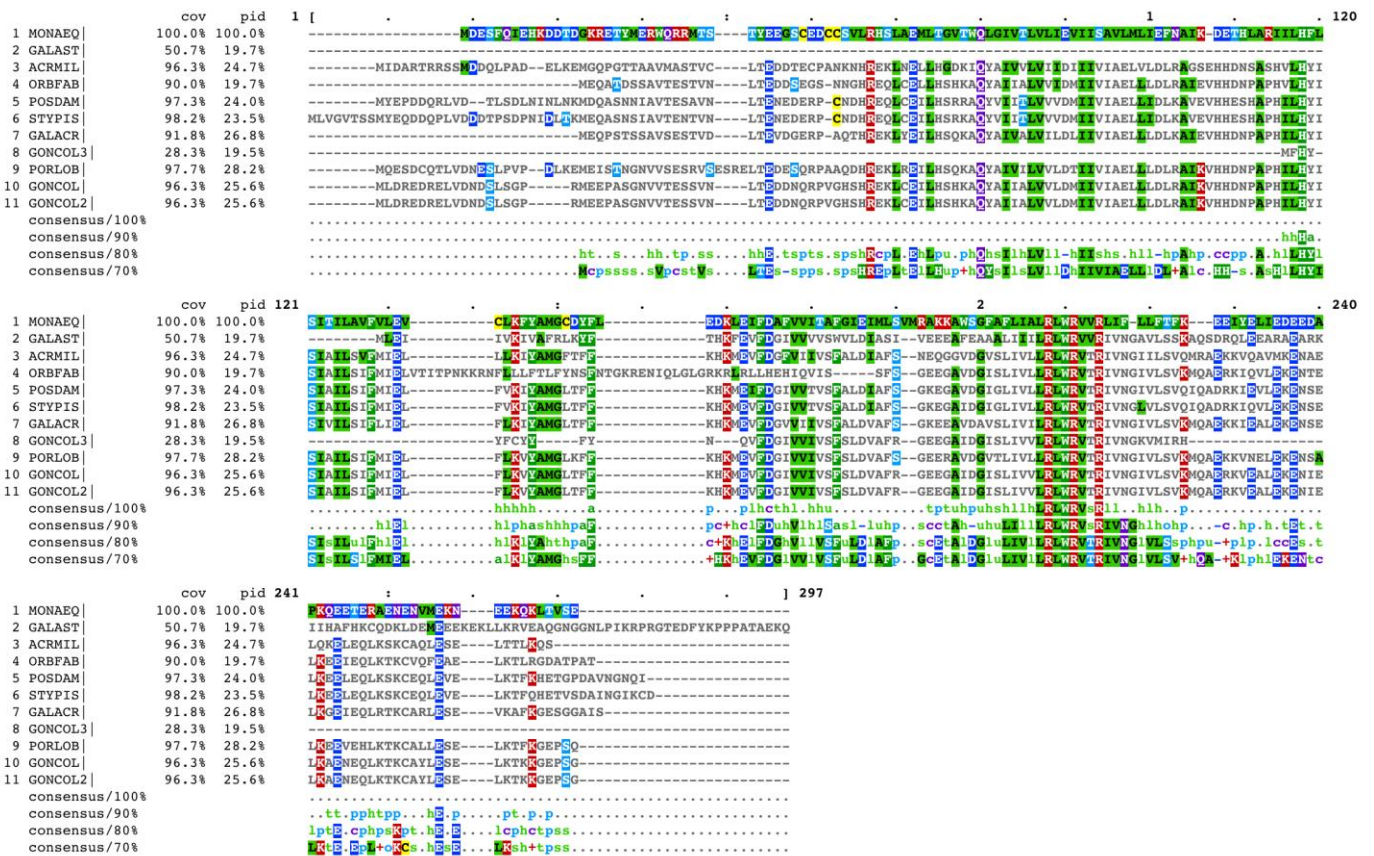

670

671

672 **Supplementary Figure 1.** Comparison of the AmHv1 protein sequence with similar  
 673 sequences found in other coral species. MONAEQ: *Montastrea*. GALAST: *Galastrea*. ACRMIL:  
 674 *Acropora millepora*. ORBFAB: *Orbicela faveolata*. POSDAM: *Posillopora damicornis*. STYPIS:  
 675 *Stylophora pistilata*. GALACR: *Galaxea*. GONCOL: *Goniopora*. PORLOB: *Porites lobata*.

676

677

A

```

Ap MIDARTRRSSMDDQLPADELKEMGQPGTTAAVMAS TVCLTEDDTECPANKNHREKLNELL
Am MIDARTRRSSMDDQLPADELKEMGQPGTTAAVMAS TVCLTEDDTECPANKNHREKLNELL
*****

Ap HGDKIQYAI VVLVI IDI I IVIAELVLD SRAGSEHHDNSASHVLHY ISIAI LSVFMI ELLL
Am HGDKIQYAI VVLVI IDI I IVIAELVLD L RAGSEHHDNSASHVLHY ISIAI LSVFMI ELLL
*****

Ap KIYAMGFTFFKHKMEVFDGFVIIVSFALDIAFSNEQGGVDGVS LIVLLRLWRVTRIVNGI
Am KIYAMGFTFFKHKMEVFDGFVIIVSFALDIAFSNEQGGVDGVS LIVLLRLWRVTRIVNGI
*****

Ap ILSVQMRAERKVQAVTKENAE LKEELEQLKSKCAQLESELTTLKQS
Am ILSVQMRAEKKVQAVMKENAE LQKELEQLKSKCAQLESELTTLKQS
*****

```

B

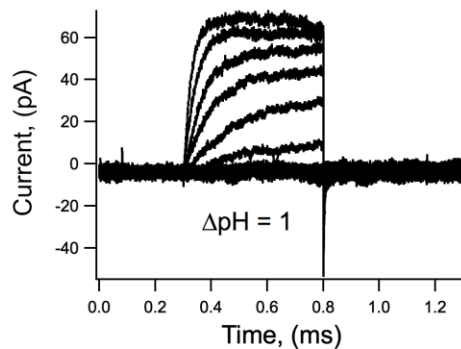

C

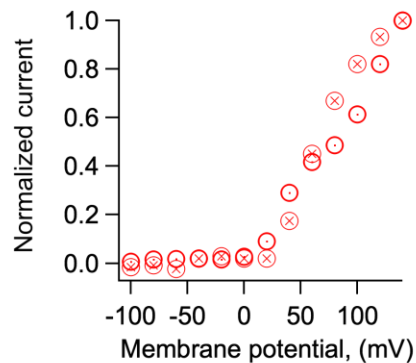

Supplementary Figure 2

678

679

680 **Supplementary Figure 2.** Some characteristics of the H<sub>v</sub>1 from *Acropora palmata*. A)  
 681 Comparison of the amino acid sequence of H<sub>v</sub>1s from *Acropora millepora* (Am) and *Acropora*  
 682 *palmata* (Ap). The asterisks bellow each residue indicate identity. B) Currents elicited from  
 683 an inside-out patch obtained from a HEK293 cell expressing ApH<sub>v</sub>1. Voltage pulses were  
 684 from -100 to 140 mV in 20 mV steps. The ΔpH was 1. C) Normalized current-voltage  
 685 relationships of two patches obtained as in B.

686 **Supplementary data. Model equations and simulations.**

687

688 The full complement of discrete states in our model is shown in Scheme I. This allosteric  
689 model predicts that the open probability,  $P(V, pH)$  is dependent on voltage and pH according  
690 to the following equations:

691 
$$P(V, pH) = \frac{K_v \cdot \Omega}{K_v \cdot \Omega + \Gamma}$$

692

693 Where: 
$$\Omega = 1 + Q_o C + Q_i D + Q_o Q_i iDEC$$

694 
$$\Gamma = 1 + Q_o + Q_i + Q_o Q_i iE$$

695 
$$K(V) = K(0) \cdot e^{(q_g V / K_B T)}$$

696 
$$Q_o = \frac{1}{1 + 10^{(pH_o - pK_o)}}$$

697 
$$Q_i = \frac{1}{1 + 10^{(pH_i - pK_i)}}$$

698 The voltage of half activation is given by:

699 
$$V_{0.5} = \frac{K_B T}{q_g} \cdot \ln \left( \frac{\Gamma}{K(0) \cdot \Omega} \right)$$

700  $pK_o$  and  $pK_i$  are the  $pK_a$  values of the extracellular and intracellular proton binding sites,  
701 respectively.

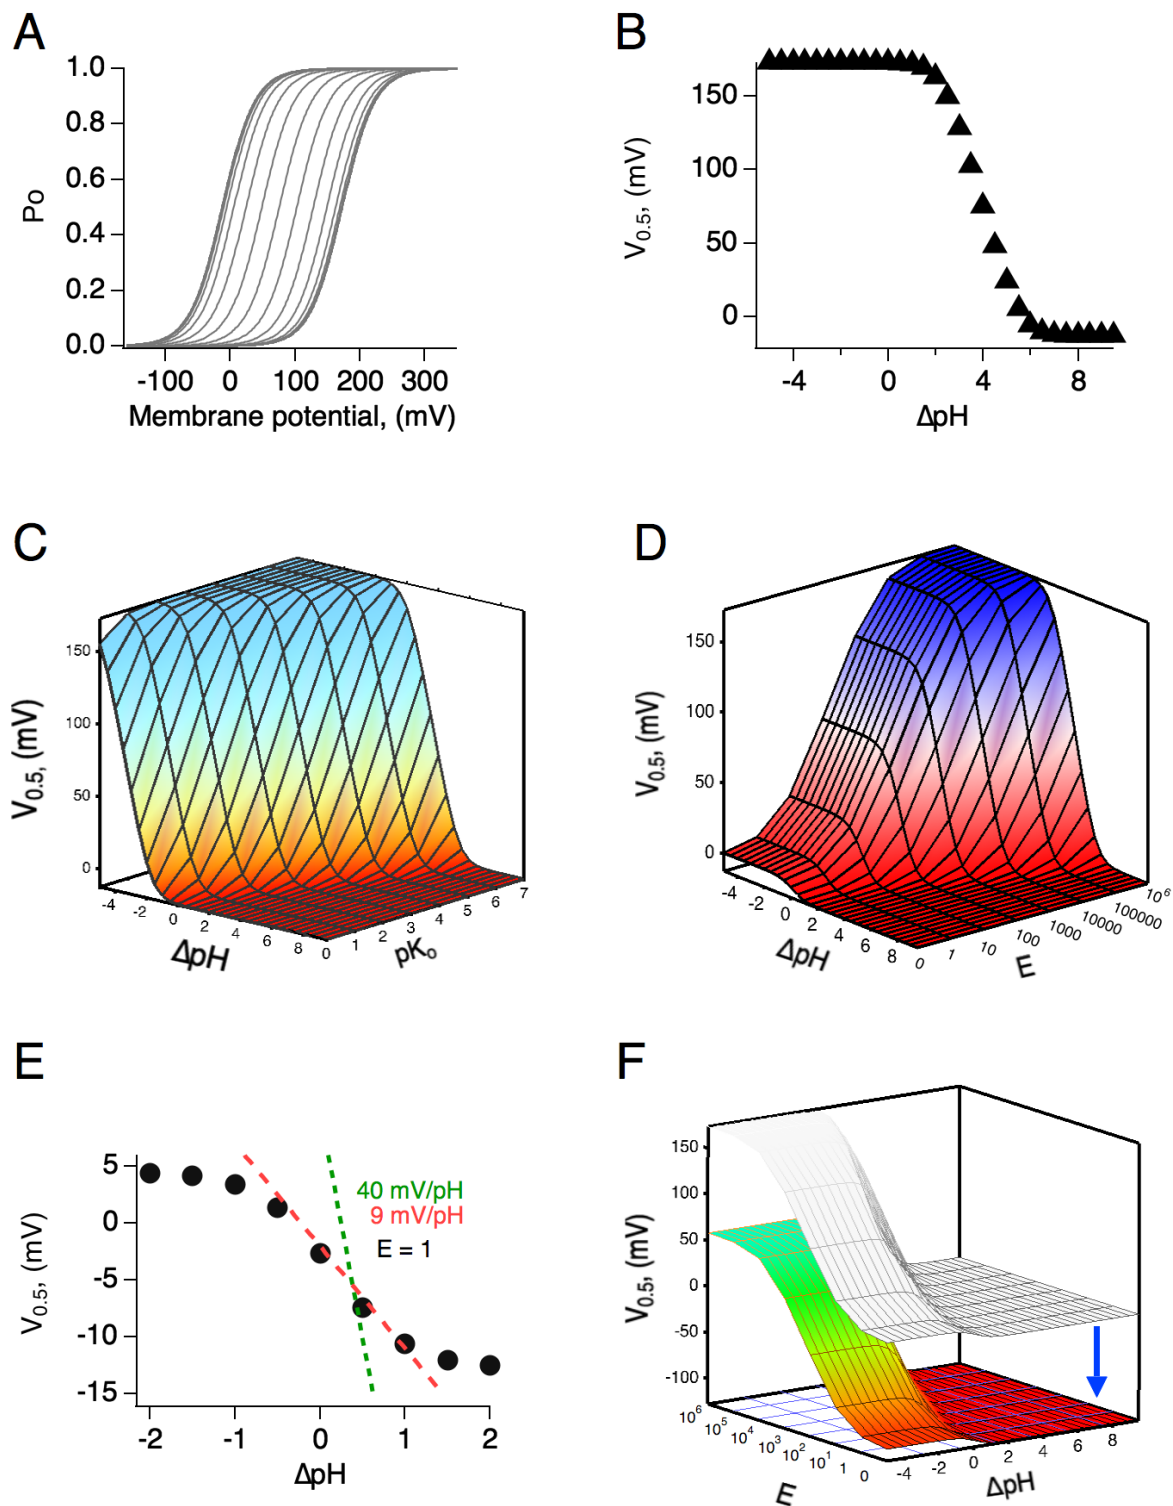

702

703 **Supplementary figure 3.** Simulations of the voltage- and pH-dependent behavior predicted

704 by the allosteric model. A) Calculated GV curves and B)  $V_{0.5}$  as a function of  $\Delta pH$ . Model

705 parameters are:  $pK_o$ ,  $pK_i = 7$ ,  $K(0) = 0.00005$ ,  $q = 1 e_o$ ,  $E = 10^6$ ,  $C = 0.0002$ ,  $D = 10^5$ . C)  $V_{0.5}$  as  
706 a function of  $\Delta pH$  calculated for different values of the  $pK_o$ . D)  $V_{0.5}$  as a function of  $\Delta pH$   
707 calculated for different values of the coupling factor  $E$ , which determines the allosteric  
708 communication between external and internal protonation sites. Note that lack of coupling  
709 between sites ( $E = 1$ ), results in channels with very shallow modulation by  $pH$ , as illustrated  
710 in E. All other parameters are as in A and B. E) A slice of the surface in D, with  $E = 1$ . The two  
711 lines show the expected dependence of  $V_{0.5}$  on  $\Delta pH$  for a fully modulated channel ( $E > 100$ ).  
712 Also shown is the dependence of  $9 \text{ mV}/\Delta pH$  unit. F) The range of  $V_{0.5}$  is dependent on the  
713 value of the voltage-dependent equilibrium constant at  $0 \text{ mV}$ . An increase to  $K(0) = 0.005$   
714 shifts the whole surface by approximately  $-110 \text{ mV}$ . All other parameters are as in D.
